# Supplementary material for: Fibrin(ogen) in human disease: both friend and foe
Source: PubMed Central journal article supplement — Haematologica. 2020 Jan 16;105(2):284–96. doi: 10.3324/haematol.2019.236901 (PMC7012490; doi:10.3324/haematol.2019.236901), 2020-02
Supplement: 2019_236901-Disclosures_and_Contributions.pdf [file 2019_236901-Disclosures_and_Contributions.pdf]

Haematologica  
HAEMATOL/2019/236901  
Version 3

Fibrin(ogen) in human disease: both friend and foe

Rui Vilar, Richard J. Fish, Alessandro Casini, and Marguerite  
Neerman-Arbez

Disclosures: 1. This work was supported by a Swiss National Science Foundation grant (#31003A\_172864) to M. Neerman-Arbez. 2. A. Casini: unrestricted grants from BioTest, CSL Behring, and NovoNordisk. Non-financial support from Bayer, Shire and Sobi. R. Fish: Non-financial support from NovoNordisk 3. none declared

Contributions: Rui Vilar wrote the first draft of the review and prepared the figures. Marguerite Neerman-Arbez directed the work. Rui Vilar, Richard Fish, Alessandro Casini and Marguerite Neerman-Arbez were responsible for writing and editing the final version.
